# Supplementary material
Source: publisher figshare collection journal article supplement (https://asha.figshare.com/ndownloader/files/16266959)
Supplement: Supplementary file 1 [file 16266959]

## Contents

|                                                                 |    |
|-----------------------------------------------------------------|----|
| Further Analysis Details .....                                  | 1  |
| Multiple Imputation.....                                        | 1  |
| Multiple Imputation Tables. ....                                | 2  |
| Additional information regarding regression analyses.....       | 4  |
| Correlation Table. ....                                         | 4  |
| Results by rDLD Naming Vocabulary and DLD Parent Report. ....   | 7  |
| Additional Analysis Details about Growth Mixture Modelling..... | 9  |
| Individualised trajectories for the final GMMs.....             | 12 |
| Full statistics for GMM subgroup comparisons. ....              | 13 |
| References .....                                                | 18 |

## Further Analysis Details

**Multiple Imputation.** With the exception of SDQ peer subscale which had a high level of valid data, multiple imputation procedures were used to account for missing values within all the predictor variables detailed in Table 1. Imputation of independence/self-regulation and emotional dysregulation did not fill any missing data due to both a high level of valid data as well as insufficient valid data within the multiple imputation predictors.

The imputation model included all variables in the analysis models described below as well as naming vocabulary at age 3, the rDLD variable, and a variety of socioeconomic variables that were related to either the value of imputation variables or to the missingness of the imputation variable. Please see the below for the full list of variables included in the imputation for each imputed predictor variable. The imputation procedure was the “mi compute” command within Stata 14 (StataCorp., 2015). The method of imputation used was sequential imputation using chained equations, which allowed unique prediction equations for each imputed variable. The estimation used was predictive mean matching, which is a method of imputation where a predictive value is derived for all data, not simply the missing value. The individuals with missing values are then matched to close “neighbours” with a very similar prediction but no missing data. The real value from one of

the five possible “neighbours” was chosen randomly to replace the missing value. Twenty imputations were produced, allowing adequate variability in the missing value prediction.

#### Multiple Imputation Tables.

See the Table S1 for the variables used in the imputation model for the Mood Variable.

Additional tables for all other imputed variables will be provided upon request to the first author ([m.c.st.clair@bath.ac.uk](mailto:m.c.st.clair@bath.ac.uk)).

Table S1. Imputation for the Mood variable.

| Variables in Multiple Imputation Model | Wave | Analysis Model | Correlates of Analysis Variables | Correlates of Missingness | % Non-Missing |
|----------------------------------------|------|----------------|----------------------------------|---------------------------|---------------|
| Irritability (temperament)             | 1    | Yes            |                                  |                           | 91.0          |
| Regularity (temperament)               | 1    | Yes            |                                  |                           | 89.6          |
| Approach/withdrawal (temperament)      | 1    | Yes            |                                  |                           | 67.3          |
| Adaptability (temperament)             | 1    | Yes            |                                  |                           | 78.5          |
| Maternal Attachment                    | 1    | Yes            |                                  |                           | 79.6          |
| Naming Vocabulary (Age 3)              | 2    | Yes            |                                  |                           | 92.5          |
| Self-regulation (Age 3)                | 2    | Yes            |                                  |                           | 77.1          |
| Emotional Dysregulation (Age 3)        | 2    | Yes            |                                  |                           | 77.1          |
| Parent-Child Relationship              | 2    | Yes            |                                  |                           | 70.8          |
| Child gender                           | 1&2  | Yes            |                                  |                           | 98.68         |
| OECD Poverty Indicator                 | 1&2  | Yes            |                                  |                           | 99.86         |
| SDQ Emotional Subscale Age 3           | 2    | Yes            |                                  |                           | 94.50         |
| SDQ Emotional Subscale Age 11          | 5    | Yes            |                                  |                           | 75.41         |
| rDL                                    | --   | Yes            |                                  |                           | 100           |
| OECD Equivalised income                | 1&2  |                |                                  | Yes                       | 99.90         |
| Respondent Gender                      | 1    |                |                                  | Yes                       | 95.79         |
| Respondent Age                         | 1    |                |                                  | Yes                       | 95.78         |
| SDQ Peer Subscale age 3                | 2    |                | Yes                              |                           | 93.88         |
| SDQ Conduct Subscale age 3             | 2    |                | Yes                              |                           | 94.66         |
| SDQ Hyperactivity Subscale age 3       | 2    |                | Yes                              |                           | 93.75         |
| SDQ Prosocial Subscale age 3           | 2    |                | Yes                              |                           | 93.98         |
| Self-Regulation (Age 5)                | 3    |                | Yes                              |                           | 86.74         |
| Emotional Dysregulation (Age 5)        | 3    |                | Yes                              |                           | 86.75         |
| Parental Self esteem                   | 1    |                | Yes                              |                           | 80.8          |
| Languages spoken at home               | 1    |                | Yes                              | Yes                       | 95.79         |
| Respondent Ethnicity                   | 1    |                | Yes                              | Yes                       | 95.59         |
| Respondent in work                     | 1    |                | Yes                              | Yes                       | 95.69         |
| Respondent general health              | 1    |                | Yes                              | Yes                       | 95.71         |
| Respondent Relationship Status         | 1    |                |                                  | Yes                       | 95.47         |
| Lived apart from baby (until 9 months) | 1    |                |                                  | Yes                       | 95.67         |
| Respondent relationship to child       |      |                |                                  | Yes                       | 95.79         |

[Additional information regarding regression analyses](#). For the variable regularity, the most frequent category was the highest response rather than the lowest response. To fit the distributional requirements for binomial regression, this variable was reversed only for the regression analysis.

[Correlation Table](#). For both the rDLN and GP groups, please see the correlations between all predictors and outcome variables in Table S2.

Table S2. Correlation between emotional difficulties at age 3, 5, 7, 11 and all predictor variables by rDLD/GP group (GP in *italics* with rDLD in normal text)

|                                         | 1.      | 2.      | 3.     | 4.     | 5.      | 6.      | 7.      | 8.      | 9.      | 10.     | 11.     | 12.     | 13.     | 14.     | 15.     |
|-----------------------------------------|---------|---------|--------|--------|---------|---------|---------|---------|---------|---------|---------|---------|---------|---------|---------|
| 1. Emotional problems age 3             | 1       | .42***  | .35*** | .26*** | -.09*** | .11***  | -.11*** | .18***  | .14***  | .19***  | -.06*** | -.13*** | .29***  | -.30*** | .31***  |
| 2. Emotional problems age 5             | .35***  | 1       | .51*** | .38*** | -.07*** | .10***  | -.10*** | .15***  | .12***  | .21***  | -.07*** | -.09*** | .22***  | -.25*** | .24***  |
| 3. Emotional problems age 7             | .36***  | .47***  | 1      | .48*** | -.06*** | .08***  | -.08*** | .10***  | .10***  | .20***  | -.05*** | -.09*** | .22***  | -.24*** | .23***  |
| 4. Emotional problems age 11            | .29***  | .39***  | .49*** | 1      | -.05*** | .07***  | -.06*** | .08***  | .06***  | .21***  | -.04*** | -.06*** | .21***  | -.23*** | .20***  |
| 5. Mood (9 months)                      | -.18*** | -.15*** | -.10*  | -.09   | 1       | -.25*** | .12***  | -.10*** | -.18*** | -.11*** | .17***  | .12***  | -.09*** | .14***  | .08***  |
| 6. Irritability (9 months)              | .11*    | .15***  | .18*** | .11*   | -.16*** | 1       | -.10*** | .17***  | .31***  | .19***  | -.22*** | -.07*** | .15***  | -.20*** | .08***  |
| 7. Regularity (9 months)                | -.22*** | .08*    | -.12** | -.12** | .17***  | -.10*   | 1       | -.05*** | -.02    | -.14*** | .05***  | .06***  | -.11*** | .12***  | -.14*** |
| 8. Approach/Withdrawal (9 months)       | .19***  | .08     | .08    | -.01   | -.09    | .17***  | -.06    | 1       | .48***  | .11***  | -.05*** | -.06*** | .10***  | -.10*** | .13***  |
| 9. Adaptability (9 months)              | .15**   | .12**   | .10*   | .09    | -.14**  | .30***  | -.02    | .48***  | 1       | .13***  | -.09*** | -.07*** | .09***  | -.11*** | .08***  |
| 10. Parental Psych. Distress (9 months) | .18***  | .22***  | .26*** | .22*** | -.15*** | .17***  | -.11**  | .16***  | .18***  | 1       | -.23*** | -.05*** | .20***  | -.26*** | .15***  |
| 11. Maternal Attachment (9 months)      | -.11*   | -.12**  | -.11*  | -.12*  | .18***  | -.20*** | .08     | .01     | -.09*   | -.27*** | 1       | -.12*** | -.08*** | .24***  | -.06*** |
| 12. Independence/Self-Reg. (3 years)    | -.16*** | -.13*** | -.03   | -.09*  | .12**   | -.09*   | .09*    | -.05    | -.11*   | -.07    | .06     | 1       | -.10*** | .19***  | -.17*** |

|                                            |         |         |         |         |        |         |        |         |         |         |        |         |         |         |         |
|--------------------------------------------|---------|---------|---------|---------|--------|---------|--------|---------|---------|---------|--------|---------|---------|---------|---------|
| 13. Emotional Dysreg.<br>(3 years)         | .24***  | .24***  | .20***  | .22***  | -.14** | .20***  | -.10*  | .12*    | .14**   | .21***  | -.08   | -.02    | 1       | -.53*** | .22***  |
| 14. Parent-Child<br>Relationship (3 years) | -.35*** | -.29*** | -.27*** | -.27*** | .15**  | -.20*** | .15**  | -.18*** | -.20*** | -.35*** | .26*** | .19***  | -.50*** | 1       | -.29*** |
| 15. SDQ peer<br>problems (3 years)         | .33***  | .32***  | .26***  | .19***  | -.13** | .09*    | -.11** | .18***  | .12*    | .13**   | -.13** | -.17*** | .17***  | -.32*** | 1       |

Results by rDLD Naming Vocabulary and DLD Parent Report. See Table S3 for the correlations between all variables for the rDLD by Naming Vocabulary and rDLD by Parent report classifications.

Table S3. Correlation between emotional difficulties at age 3, 5, 7, 11 and all predictor variables by rDLD Naming Vocab and rDLD Parent Report group (Naming Vocab in *italics* with Parent Report in normal text)

|                                         | 1.      | 2.     | 3.     | 4.     | 5.      | 6.     | 7.      | 8.     | 9.     | 10.     | 11.     | 12.     | 13.    | 14.     | 15.    |
|-----------------------------------------|---------|--------|--------|--------|---------|--------|---------|--------|--------|---------|---------|---------|--------|---------|--------|
| 1. Emotional problems age 3             | 1       | .31*** | .37*** | .24*** | -.22*** | .04    | -.21*** | .25*** | .15*   | .19***  | -.10    | -.19*** | .23*** | -.41*** | .40*** |
| 2. Emotional problems age 5             | .43***  | 1      | .43*** | .33*** | -.11*   | .14**  | -.08    | .07    | .06    | .18***  | -.10    | -.12*   | .19*** | -.30*** | .31*** |
| 3. Emotional problems age 7             | .38***  | .52*** | 1      | .47*** | -.08    | .13*   | -.13*   | .07    | .11    | .21***  | -.11    | .04     | .12    | -.24*** | .27*** |
| 4. Emotional problems age 11            | .35***  | .45*** | .50*** | 1      | -.06    | .12*   | -.17**  | .01    | .05    | .21***  | -.09    | -.06    | .15*   | -.19**  | .20**  |
| 5. Mood (9 months)                      | -.12    | -.13*  | -.14*  | -.11   | 1       | -.16** | .26***  | -.08   | -.14*  | -.23*** | .23***  | .20***  | -.08   | .19**   | -.20** |
| 6. Irritability (9 months)              | .19**   | .12*   | .22*** | .11    | -.19*** | 1      | -.12*   | .13*   | .21*** | .18***  | -.18*** | -.04    | .11    | -.11    | -.004  |
| 7. Regularity (9 months)                | -.27*** | -.04   | -.10   | -.09   | .08     | -.08   | 1       | -.07   | -.03   | -.14**  | .08     | .13*    | -.10   | .14*    | -.08   |
| 8. Approach/Withdrawal (9 months)       | .06     | .06    | .12    | -.03   | -.11    | .22*** | -.01    | 1      | .48*** | .15*    | -.01    | -.03    | .13    | -.23**  | .19**  |
| 9. Adaptability (9 months)              | .15*    | .14*   | .12*   | .14*   | -.17**  | .39*** | -.06    | .48*** | 1      | .17**   | -.08    | -.11    | .13    | -.19**  | .15*   |
| 10. Parental Psych. Distress (9 months) | .15*    | .24*** | .29*** | .24*** | -.05    | .16**  | -.10    | .19**  | .21*** | 1       | -.35*** | -.05    | .20**  | -.36*** | .12*   |

|                                         |         |         |         |         |       |         |        |      |        |         |       |         |         |         |         |
|-----------------------------------------|---------|---------|---------|---------|-------|---------|--------|------|--------|---------|-------|---------|---------|---------|---------|
| 11. Maternal Attachment (9 months)      | -.11    | -.10    | -.11    | -.18**  | .16** | -.26*** | .09    | .03  | -.10   | -.20*** | 1     | .11     | -.10    | .31***  | -.12*   |
| 12. Independence/ Self-Reg. (3 years)   | -.13*   | -.14**  | -.11    | -.10    | .07   | -.13*   | .07    | -.03 | -.12   | -.09    | .02   | 1       | -.003   | .18**   | -.09    |
| 13. Emotional Dysreg. (3 years)         | .22***  | .26***  | .22***  | .25***  | -.16* | .25***  | -.14*  | .07  | .11    | .20**   | -.04  | -.05    | 1       | -.46*** | .14*    |
| 14. Parent-Child Relationship (3 years) | -.26*** | -.25*** | -.28*** | -.30*** | .13*  | -.27*** | .21*** | -.12 | -.22** | -.34*** | .18** | .23***  | -.51*** | 1       | -.36*** |
| 15. SDQ peer problems (3 years)         | .24***  | .33***  | .28***  | .19**   | -.07  | .16**   | -.16** | .17* | .09    | .16**   | -.14* | -.23*** | .20***  | -.25*** | 1       |



### Additional Analysis Details about Growth Mixture Modelling.

See Table S4 for model fit statistics regarding the GMM trajectory subgroup outcomes evaluated for the entire sample.

The model fit statistics overall indicate the best fitting model was six classes which were allowed to vary on intercept, slope and quadratic age functions. The six class solution based only on intercept and slope did not converge, even with large increases in the number of random starts allowed. However, as all the intercept and slope models were poorer fit when compared to models which added the quadratic function, this model was never a possible final solution. It was noted that the entropy, or classification accuracy, for the final model (and the majority of comparison model) was relatively low. This led us to further evaluate the average posterior classification probability for the final solution. These averages are as follows: Low and Age 7 Increasing = .52; Stable Very Low = .57; Low and age 11 increasing = .56; Stable Average = .59; Average and Increasing = .74; Very High and Decreasing = .60. Upon closer examination of the posterior probabilities across all subgroups, it was found that the degree of separability between the subgroups was most difficult between the three increasing subgroups as well as between the subgroups with low levels of emotional problems early in development, which can be seen in Figure 1 below. This lower degree of separability was due to within class variation overlapping substantially across the classes, as can be seen in Figure 1. As mentioned in Muthén (2004), a low entropy does not necessarily indicate a misspecified model and can be indicative of an overlap of the within class variability between the differing subgroups. As can be seen in Figure 1, this is the case for the subgroups mentioned above, particularly during the earlier timepoints. Although the official statistic (entropy) detailing the degree of separability is below ideal levels, the individual trajectories detailed in Figure 1 indicate clearly differing patterns of trajectories across all subgroups evaluated, although with a high degree of within class variability which is not unexpected.

Table S4. Model Fit and Sample Size information for each GMMs evaluated.

| <b>Model</b>                            | <b>AIC</b>     | <b>BIC</b> | <b>BIC SSA</b> | <b>Entropy</b> | <b>VLMR Test</b> | <b>LMR Test</b> | <b>Sample Size per subgroup<sup>±</sup></b> |
|-----------------------------------------|----------------|------------|----------------|----------------|------------------|-----------------|---------------------------------------------|
| <b>Intercept</b>                        |                |            |                |                |                  |                 |                                             |
| One Subgroup                            | 158677         | 158722.4   | 158703.3       | --             | --               | --              | 14219                                       |
| Two Subgroups                           | 158253.9       | 158314.4   | 158289         | 0.559          | < .001           | <.001           | 2637/11582                                  |
| Three Subgroups                         | 158186.5       | 158262.1   | 158230.3       | 0.492          | < .001           | <.001           | 5152/1129/7938                              |
| Four Subgroups                          | 158181.1       | 158271.9   | 158233.7       | 0.497          | 0.0093           | 0.0117          | 1324/6515/1129/5251                         |
| Five subgroups                          | 158184.4       | 158290.3   | 158245.8       | 0.526          | 0.1972           | 0.2079          | 0/6519/4928/1624/1148                       |
| <b>Intercept &amp; Slope</b>            |                |            |                |                |                  |                 |                                             |
| One Subgroup                            | 157831.4       | 157884.4   | 157862.1       | --             | --               | --              | 14219                                       |
| Two Subgroups                           | 157144.2       | 157219.8   | 157188         | 0.755          | < .001           | <.001           | 12527/1692                                  |
| Three Subgroups                         | 156840.5       | 156938.8   | 156897.5       | 0.589          | < .001           | <.001           | 2818/10472/929                              |
| Four Subgroups                          | 156664.5       | 156785.5   | 156734.7       | 0.468          | 0.0001           | 0.0002          | 1899/6885/1638/3797                         |
| Five subgroups                          | 156603.1       | 156746.7   | 156686.4       | 0.504          | < .001           | <.001           | 134/1521/1540/4779/6245                     |
| Six Subgroups                           | No Convergence |            |                |                |                  |                 |                                             |
| Seven Subgroups                         | 156543.9       | 156733     | 156653.5       | 0.474          | 1                | 1               | 406/3413/1311/221/6587/1621/660             |
| <b>Intercept, Slope &amp; Quadratic</b> |                |            |                |                |                  |                 |                                             |
| One Subgroup                            | 157778.1       | 157838.6   | 157813.2       | --             | --               | --              | 14219                                       |
| Two Subgroups                           | 156929.9       | 157020.7   | 156982.5       | 0.52           | <.001            | <.001           | 4039/10180                                  |
| Three Subgroups                         | 156707.4       | 156828.4   | 156777.5       | 0.517          | 0.0048           | 0.0053          | 925/9712/3582                               |
| Four Subgroups                          | 156492.2       | 156643.4   | 156579.9       | 0.419          | 0.0007           | 0.0008          | 4950/4663/2510/2096                         |
| Five Subgroups                          | 156425.3       | 156606.8   | 156530.5       | 0.412          | 0.0587           | 0.061           | 5037/4889/1821/446/2026                     |

|                      |                 |                 |                 |              |               |               |                                         |
|----------------------|-----------------|-----------------|-----------------|--------------|---------------|---------------|-----------------------------------------|
| <b>Six Subgroups</b> | <b>156372.7</b> | <b>156584.5</b> | <b>156495.5</b> | <b>0.498</b> | <b>0.0001</b> | <b>0.0001</b> | <b>5244/1224/150/2004/<br/>164/5433</b> |
| Seven Subgroups      | 156359.4        | 156601.4        | 156499.7        | 0.493        | 0.0027        | 0.0031        | 4950/68/5487/137/134<br>5/156/2076      |
| Eight Subgroups      | 156329.1        | 156601.3        | 156486.9        | 0.5          | <.001         | <.001         | 2004/4375/190/459/11<br>70/133/4940/948 |

± based on most likely subgroup membership

### Individualised trajectories for the final GMMs.

Please see Figure S1 for a graph of the final subgroups with individual trajectories around the average growth line.

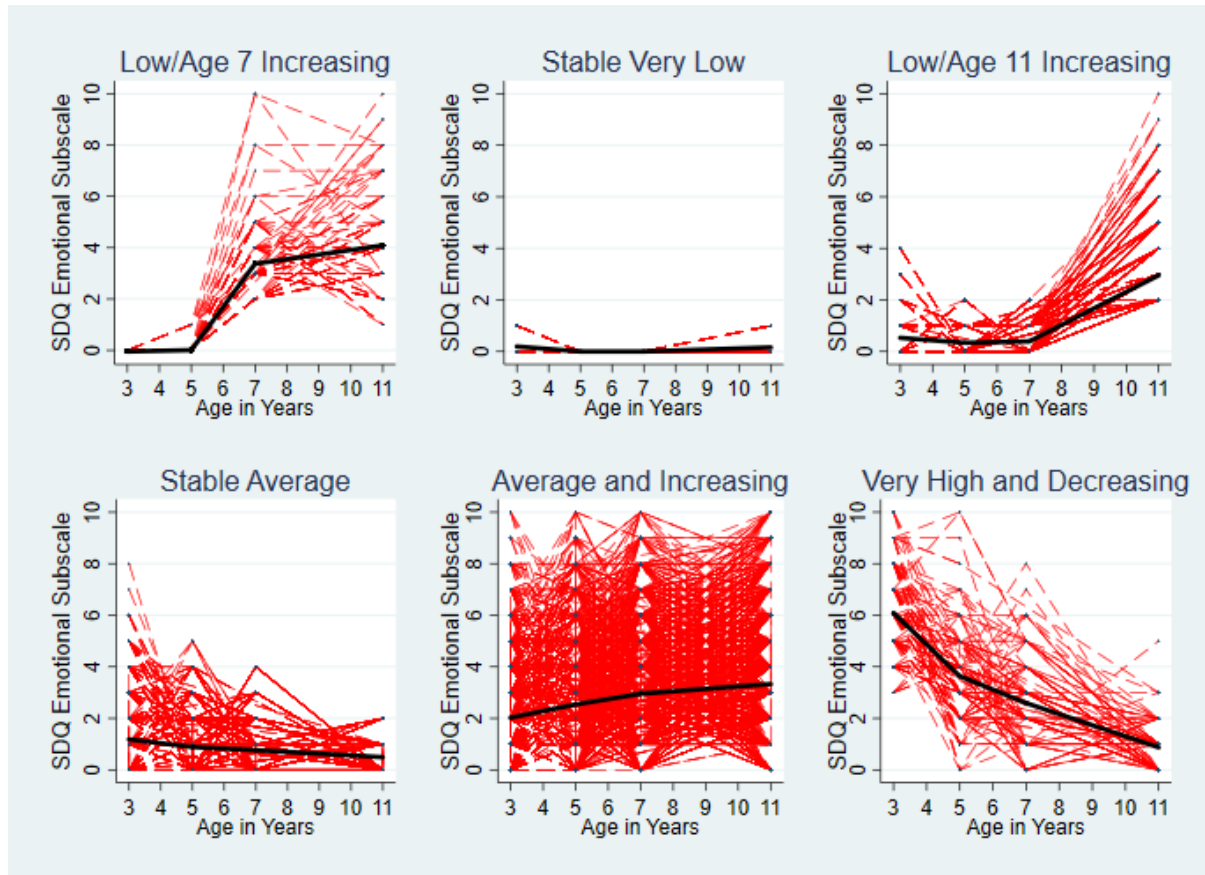

Figure S1. Individual trajectories and subgroup average trajectories for each emotional difficulty trajectory subgroup.

[Full statistics for GMM subgroup comparisons.](#)

See Table S5 for full statistics on the comparisons within each subgroup on the demographics, early risk factors and emotional symptoms.

Table S5. Full statistics for the rates of demographic, 9 month and 3 year risk factors and emotional symptoms and percentages above cutoff within each subgroup (in comparison to the combined remaining subgroups).

|                                          | <i>Overall</i> | <i>Low and age<br/>7 increase<br/>(n=164;<br/>1.2%)</i> | <i>Stable very<br/>low (n=2,004;<br/>14.1%)</i> | <i>Low and age<br/>11 increase<br/>(n=1,224;<br/>8.6%)</i> | <i>Stable Average<br/>(n=5,244;<br/>36.9%)</i> | <i>Average and<br/>Increasing<br/>(n=5,433;<br/>38.2%)</i> | <i>Very High and<br/>Decreasing<br/>(n=150; 1.1%)</i> |
|------------------------------------------|----------------|---------------------------------------------------------|-------------------------------------------------|------------------------------------------------------------|------------------------------------------------|------------------------------------------------------------|-------------------------------------------------------|
| <b>Demographic variables</b>             |                |                                                         |                                                 |                                                            |                                                |                                                            |                                                       |
| DLD                                      | 6.2%           | n.s.                                                    | OR=.52, 95%CI<br>(.39,.68),<br><i>p</i> <.001   | n.s.                                                       | OR=.66, 95%CI<br>(.54,.80),<br><i>p</i> <.001  | OR=2.06,<br>95%CI<br>(1.74,2.43),<br><i>p</i> <.001        | n.s.                                                  |
| GP only                                  | --             | n.s.                                                    | n.s.                                            | n.s.                                                       | n.s.                                           | n.s.                                                       | n.s.                                                  |
| DLD only                                 | --             | n.s.                                                    | n.s.                                            | n.s.                                                       | n.s.                                           | n.s.                                                       | n.s.                                                  |
| Average age (Years,<br>Months)           | 3;1.5          | n.s.                                                    | n.s.                                            | n.s.                                                       | n.s.                                           | n.s.                                                       | n.s.                                                  |
| Premature birth (< 37<br>week gestation) | 6.4%           | n.s.                                                    | n.s.                                            | n.s.                                                       | OR=.83, 95%CI<br>(.69,.99),<br><i>p</i> <.05   | OR=1.29,<br>95%CI<br>(1.10,1.52),<br><i>p</i> <.005        | n.s.                                                  |
| Female (%)                               | 49.4%          | n.s.                                                    | OR=.84, 95%CI<br>(.75,.94),<br><i>p</i> <.005   | n.s.                                                       | OR=.88, 95%CI<br>(.81,.95),<br><i>p</i> <.005  | OR=1.26,<br>95%CI<br>(1.16,1.36),<br><i>p</i> <.001        | n.s.                                                  |
| Poverty Indicator (%) <sup>+</sup>       | 29.9%          | n.s.                                                    | OR=.59, 95%CI<br>(.51,.69),<br><i>p</i> <.001   | OR=.83, 95%CI<br>(.69,.98), <i>p</i> <.05                  | OR=.73, 95%CI<br>(.67,.80),<br><i>p</i> <.001  | OR=1.73,<br>95%CI<br>(1.59,1.89),<br><i>p</i> <.001        | OR=3.08,<br>95%CI<br>(2.10,4.52),<br><i>p</i> <.001   |
| <b>9 Month Predictors</b>                |                |                                                         |                                                 |                                                            |                                                |                                                            |                                                       |

|                                           |             |                                               |                                                   |                                                  |                                                   |                                                   |                                                |
|-------------------------------------------|-------------|-----------------------------------------------|---------------------------------------------------|--------------------------------------------------|---------------------------------------------------|---------------------------------------------------|------------------------------------------------|
| Mood                                      | 3.85 (.01)  | n.s.                                          | $\beta = .16$ , 95%CI (.10;.23),<br>$p < .001$    | n.s.                                             | n.s.                                              | $\beta = -.14$ , 95%CI (-.19;-.10),<br>$p < .001$ | n.s.                                           |
| Irritability                              | 2.07 (.01)  | n.s.                                          | $\beta = -.22$ , 95%CI (-.28;-.16),<br>$p < .001$ | n.s.                                             | n.s.                                              | $\beta = .20$ , 95%CI (.16;.24),<br>$p < .001$    | $\beta = .43$ , 95%CI (.22;.65),<br>$p < .001$ |
| Regularity <sup>a</sup>                   | 4.31 (.01)  | n.s.                                          | $B = -.06$ , 95%CI (-.08;-.04),<br>$p < .001$     | n.s.                                             | $B = -.02$ , 95%CI (-.04;-.01),<br>$p < .01$      | $\beta = -.06$ , 95%CI (-.07;-.04),<br>$p < .001$ | $\beta = .10$ , 95%CI (.02;.18), $p < .05$     |
| Approach/withdrawal                       | 1.77 (.01)  | $B = -.12$ , 95%CI (-.21;-.04), $p < .01$     | $B = -.10$ , 95%CI (-.13;-.07),<br>$p < .001$     | n.s.                                             | n.s.                                              | $\beta = .08$ , 95%CI (.06;.10),<br>$p < .001$    | $\beta = .13$ , 95%CI (.04;.22), $p < .01$     |
| Adaptability                              | 2.18 (.01)  | $B = -.22$ , 95%CI (-.39;-.05), $p < .05$     | $\beta = -.22$ , 95%CI (-.27;-.16),<br>$p < .001$ | $\beta = -.11$ , 95%CI (-.18;-.04),<br>$p < .01$ | n.s.                                              | $\beta = .18$ , 95%CI (.14;.23),<br>$p < .001$    | $\beta = .41$ , 95%CI (.19;.62),<br>$p < .001$ |
| Parental psychological distress           | 1.61 (.02)  | n.s.                                          | $B = -.44$ , 95%CI (-.51;-.37),<br>$p < .001$     | n.s.                                             | $B = -.22$ , 95%CI (-.27;-.18),<br>$p < .001$     | $B = .39$ , 95%CI (.34;.43),<br>$p < .001$        | $B = .24$ , 95%CI (.08;.41), $p < .01$         |
| Maternal Attachment                       | 18.59 (.03) | $\beta = .22$ , 95%CI (.03;.42),<br>$p < .05$ | $\beta = .15$ , 95%CI (.10;.21),<br>$p < .001$    | n.s.                                             | $\beta = .04$ , 95%CI (-.21;-.05),<br>$p < .01$   | $\beta = -.14$ , 95%CI (-.19;-.10),<br>$p < .001$ | n.s.                                           |
| 3 Year Predictors                         |             |                                               |                                                   |                                                  |                                                   |                                                   |                                                |
| Independence/Self-Regulation <sup>a</sup> | 2.47 (.004) | $\beta = .26$ , 95%CI (.08;.44),<br>$p < .01$ | $\beta = .21$ , 95%CI (.16;.26),<br>$p < .001$    | $\beta = .08$ , 95%CI (.01;.14), $p < .05$       | $\beta = .06$ , 95%CI (.02;.10),<br>$p < .01$     | $\beta = -.21$ , 95%CI (-.25;-.17),<br>$p < .001$ | n.s.                                           |
| Emotional Dysregulation                   | 1.87 (.01)  | n.s.                                          | $\beta = -.43$ , 95%CI (-.49;-.36),<br>$p < .001$ | n.s.                                             | $\beta = -.19$ , 95%CI (-.23;-.15),<br>$p < .001$ | $\beta = .40$ , 95%CI (.36;.45),<br>$p < .001$    | $\beta = .76$ , 95%CI (.58;.94),<br>$p < .001$ |

|                                        |             |                                           |                                           |                                           |                                           |                                            |                                              |
|----------------------------------------|-------------|-------------------------------------------|-------------------------------------------|-------------------------------------------|-------------------------------------------|--------------------------------------------|----------------------------------------------|
| Parent-Child Relationship <sup>a</sup> | 64.23 (.09) | n.s.                                      | $\beta=.47$ , 95%CI (.41;.52), $p<.001$   | n.s.                                      | $\beta=.21$ , 95%CI (.17;.25), $p<.001$   | $\beta=-.47$ , 95%CI (-.51;-.42), $p<.001$ | $\beta=-.64$ , 95%CI (-.87;-.42), $p<.001$   |
| SDQ Peer Problems Age 3                | 1.48 (.02)  | n.s.                                      | $B=-.56$ , 95%CI (-.63;-.49), $p<.001$    | $\beta=-.13$ , 95%CI (-.21;-.05), $p<.01$ | $B=-.19$ , 95%CI (-.23;-.15), $p<.001$    | $B=.42$ , 95%CI (.38;.46), $p<.001$        | $B=.58$ , 95%CI (.43;.74), $p<.001$          |
| SDQ Emotional Problems                 |             |                                           |                                           |                                           |                                           |                                            |                                              |
| Age 3                                  | 1.32 (.02)  | --                                        | $B=-1.97$ , 95%CI (-2.09;-1.85), $p<.001$ | $B=-.91$ , 95%CI (-1.01;-.81), $p<.001$   | $B=-.16$ , 95%CI (-.21;-.11), $p<.001$    | $B=.76$ , 95%CI (.72;.80), $p<.001$        | $B=1.48$ , 95%CI (1.41;1.55), $p<.001$       |
| Age 5                                  | 1.34 (.02)  | $B=-3.16$ , 95%CI (-4.02;-2.31), $p<.001$ | --                                        | $B=-1.46$ , 95%CI (-1.57;-1.35), $p<.001$ | $B=-.57$ , 95%CI (-.62;-.53), $p<.001$    | $B=1.38$ , 95%CI (1.34;1.42), $p<.001$     | $B=.96$ , 95%CI (.85;1.08), $p<.001$         |
| Age 7                                  | 1.52 (.02)  | $B=.83$ , 95%CI (.73;.93), $p<.001$       | --                                        | $B=-1.41$ , 95%CI (-1.51;-1.31), $p<.001$ | $B=-.90$ , 95%CI (-.95;-.85), $p<.001$    | $B=1.55$ , 95%CI (1.50;1.60), $p<.001$     | $B=.47$ , 95%CI (.33;.60), $p<.001$          |
| Age 11                                 | 1.88 (.03)  | $B=.85$ , 95%CI (.71;.99), $p<.001$       | $B=-2.55$ , 95%CI (-2.68;-2.42), $p<.001$ | $B=.55$ , 95%CI (.51;.59), $p<.001$       | $B=-1.65$ , 95%CI (-1.70;-1.60), $p<.001$ | $B=1.28$ , 95%CI (1.23;1.33), $p<.001$     | $B=-.90$ , 95%CI (-1.09;-.70), $p<.001$      |
| Age 3 % High/Very High                 | 7.8%        | --                                        | --                                        | $OR=.10$ , 95%CI (.05,.22), $p<.001$      | $OR=.24$ , 95%CI (.19,.30), $p<.001$      | $OR=4.87$ , 95%CI (4.12,5.76), $p<.001$    | $OR=184.87$ , 95%CI (74.72,457.37), $p<.001$ |
| Age 5 % High/Very High                 | 5.0%        | --                                        | --                                        | --                                        | $OR=.01$ , 95%CI (.003,.03), $p<.001$     | $OR=25.95$ , 95%CI (18.38,36.63), $p<.001$ | $OR=7.19$ , 95%CI (4.48,11.54), $p<.001$     |



|                         |       |                                               |    |      |    |                                                  |                                              |
|-------------------------|-------|-----------------------------------------------|----|------|----|--------------------------------------------------|----------------------------------------------|
| Age 7 % High/Very High  | 7.3%  | OR=2.63,<br>95%CI<br>(1.40,4.95),<br>$p<.01$  | -- | --   | -- | OR=33.34,<br>95%CI<br>(23.10,48.11),<br>$p<.001$ | OR=1.77,<br>95%CI<br>(1.03,3.05),<br>$p<.05$ |
| Age 11 % High/Very High | 11.3% | OR=5.00,<br>95%CI<br>(3.12,8.01),<br>$p<.001$ | -- | n.s. | -- | OR=11.34,<br>95%CI<br>(9.29,13.84),<br>$p<.001$  | OR=.02, 95%CI<br>(.003,.11),<br>$p<.001$     |

---

$*p<.05$ ;  $**p<.01$ ;  $***p<.001$

## References

- Condon, J. T., & Corkindale, C. J. (1998). The assessment of parent-to-infant attachment: Development of a self-report questionnaire instrument. *Journal of Reproductive and Infant Psychology, 16*, 57-76.
- Condon, J. T., & Dunn, D. J. (1988). Nature and Determinants of Parent-to-Infant Attachment in the Early Postnatal-Period. *J Am Acad Child Adolesc Psychiatry, 27*(3), 293-299.
- Driscoll, K., & Pianta, R. C. (2011). Mothers' and Fathers' perceptions of conflict and closeness in Parent-Child relationships during early childhood. *Journal of Early Childhood and Infant Psychology, 7*, 1-24.
- Goodman, R. (1999). The extended version of the strengths and difficulties questionnaire as a guide to child psychiatric caseness and consequent burden. *Journal of Child Psychology and Psychiatry and Allied Disciplines, 40*(5), 791-799.
- Goodman, R. (2001). Psychometric properties of the strengths and difficulties questionnaire. *J Am Acad Child Adolesc Psychiatry, 40*(11), 1337-1345.
- Johnson, J. (Ed.). (2012). *Millennium Cohort Study: Psychology, Developmental and Health Inventories*. London: Centre for Longitudinal Studies.
- Muthén, B. (2004). Latent Variable Analysis: Growth mixture modeling and related techniques for longitudinal data. In D. Kaplan (Ed.), *Handbook of Quantitative Methodology for the Social Sciences* (pp. 345-368). Newbury Park, CA: Sage Publications.
- Rutter, M., Tizard, J., & Whitmore, K. (1970). *Education, health and behaviour*. Harlow,: Longman.
- StataCorp. (2015). *Stata Statistical Software: Release 14*. College Station, TX: StataCorp LP.
